# Supplementary material
Source: PubMed Central journal article supplement (PMC2680106)
Supplement: supp_136_11_1791__1.pdf [file supp_136_11_1791__1.pdf]

**Table S1. Dorsal enriched genes**

| Unigene ID | Gene title                                                             | Dorsal bud average | Ventral bud average | Fold enrichment in dorsal bud* |
|------------|------------------------------------------------------------------------|--------------------|---------------------|--------------------------------|
| XI.23623   | Insulin II                                                             | 1309.2             | 29.5                | 37.91                          |
| XI.817     | Insulin I                                                              | 2320.0             | 57.5                | 37.12                          |
| XI.1272    | Prohormone convertase PC2                                              | 119.4              | 4.0                 | 13.20                          |
| XI.4241    | Panza                                                                  | 532.7              | 40.2                | 11.78                          |
| XI.6024    | Glutamate carboxypeptidase-like protein 1                              | 964.8              | 87.0                | 10.48                          |
| XI.22766   | MGC80496                                                               | 46.6               | 1.6                 | 7.11                           |
| XI.647     | Paired box gene 6 (Pax6)                                               | 33.9               | 1.1                 | 5.52                           |
| XI.15      | Secretogranin III                                                      | 31.3               | 1.1                 | 5.17                           |
| XI.23712   | MGC84798                                                               | 43.1               | 4.2                 | 4.68                           |
| XI.8836    | Carboxypeptidase E                                                     | 47.7               | 5.5                 | 4.54                           |
| XI.21888   | Similar to complement component 6                                      | 97.0               | 19.5                | 3.97                           |
| XI.8476    | Carboxypeptidase E                                                     | 71.2               | 16.5                | 3.30                           |
| XI.1105    | 7B2 pituitary protein                                                  | 21.6               | 1.6                 | 3.29                           |
| XI.330     | Neurogenic differentiation 1 (NeuroD)                                  | 53.2               | 11.5                | 3.22                           |
| XI.212     | Frzb-1                                                                 | 164.0              | 47.0                | 3.16                           |
| XI.932     | Deoxyribonuclease I                                                    | 507.5              | 159.9               | 3.08                           |
| XI.1929    | Frzb-1                                                                 | 66.1               | 18.0                | 2.87                           |
| XI.6757    | DEAH (Asp-Glu-Ala-His) box polypeptide 33                              | 27.8               | 5.4                 | 2.67                           |
| XI.3378    | Endod                                                                  | 503.4              | 184.3               | 2.66                           |
| XI.647     | Paired box gene 6 (Pax6)                                               | 21.3               | 3.1                 | 2.64                           |
| XI.14733   | Insuloma-associated 1 (Insm1)                                          | 50.5               | 14.6                | 2.58                           |
| XI.24557   | MGC84299                                                               | 17.3               | 1.8                 | 2.56                           |
| XI.25952   | MGC68683                                                               | 58.4               | 17.9                | 2.55                           |
| XI.3011    | Transcribed locus                                                      | 209.2              | 77.0                | 2.55                           |
| XI.13620   | Transcribed locus                                                      | 17.8               | 2.1                 | 2.53                           |
| XI.11047   | Transcribed locus                                                      | 95.0               | 32.8                | 2.51                           |
| XI.15675   | Similar to stromal cell derived factor receptor 2                      | 266.7              | 101.9               | 2.50                           |
| XI.17296   | Transcribed locus                                                      | 47.4               | 14.0                | 2.50                           |
| XI.606     | Collagen, type II, alpha 1                                             | 59.1               | 19.1                | 2.46                           |
| XI.11165   | Transcribed locus                                                      | 51.3               | 16.0                | 2.45                           |
| XI.637     | Early growth response protein                                          | 69.8               | 23.6                | 2.44                           |
| XI.5831    | Similar to EH-domain containing 2                                      | 26.9               | 6.3                 | 2.37                           |
| XI.15742   | Transcribed locus                                                      | 25.7               | 5.8                 | 2.37                           |
| XI.10636   | Transcribed locus                                                      | 27.5               | 6.8                 | 2.33                           |
| XI.14367   | Transcribed locus                                                      | 139.6              | 56.3                | 2.28                           |
| XI.6677    | Cyclin E1                                                              | 25.6               | 6.5                 | 2.23                           |
| XI.15089   | Transcribed locus                                                      | 364.3              | 158.6               | 2.23                           |
| XI.6353    | Glycine C-acetyltransferase (2-amino-3-ketobutyrate coenzyme A ligase) | 342.8              | 151.0               | 2.20                           |
| XI.647     | Paired box gene 6 (Pax6)                                               | 18.3               | 3.4                 | 2.17                           |
| XI.12160   | Trinucleotide repeat containing 4                                      | 23.0               | 5.6                 | 2.16                           |
| XI.198     | Thrombospondin 3                                                       | 49.1               | 17.8                | 2.15                           |
| XI.24221   | Transcribed locus                                                      | 359.5              | 162.6               | 2.15                           |
| XI.251     | Dickkopf homolog 1                                                     | 25.5               | 6.9                 | 2.13                           |
| XI.647     | Paired box gene 6 (Pax6)                                               | 21.6               | 5.1                 | 2.13                           |
| XI.6690    | LOC495431                                                              | 58.3               | 22.4                | 2.13                           |
| XI.12180   | Putative growth hormone like protein-1                                 | 41.1               | 14.7                | 2.09                           |
| XI.21515   | C-fos proto-oncogene                                                   | 19.5               | 4.5                 | 2.05                           |
| XI.15593   | MGC82107                                                               | 123.4              | 55.9                | 2.02                           |
| XI.17442   | Procollagen C-endopeptidase enhancer 2                                 | 31.2               | 10.5                | 2.01                           |
| XI.26111   | LOC100101272                                                           | 11.4               | 0.7                 | 2.01                           |
| XI.24225   | Transcribed locus                                                      | 17.0               | 3.5                 | 1.99                           |
| XI.22355   | Transcribed locus                                                      | 246.5              | 119.2               | 1.99                           |
| XI.684     | Catenin arvcf-2ABC protein                                             | 38.4               | 14.8                | 1.94                           |
| XI.24380   | MGC68923                                                               | 17.2               | 3.9                 | 1.92                           |
| XI.2466    | MGC82199                                                               | 166.1              | 81.4                | 1.92                           |
| XI.986     | Elav-type ribonucleoprotein (etr-1)                                    | 22.1               | 6.6                 | 1.91                           |
| XI.15089   | Protocadherin PCNS                                                     | 554.5              | 288.2               | 1.89                           |
| XI.12488   | Transcribed locus                                                      | 12.2               | 1.5                 | 1.88                           |
| XI.23706   | Transcribed locus                                                      | 62.4               | 28.3                | 1.87                           |
| XI.12129   | Ftz-F1-related orphan receptor B                                       | 125.8              | 62.4                | 1.87                           |
| XI.7523    | Cdc25A                                                                 | 22.1               | 6.9                 | 1.86                           |
| XI.15089   | Protocadherin PCNS                                                     | 252.9              | 130.9               | 1.86                           |
| XI.4042    | MGC80644                                                               | 20.9               | 6.2                 | 1.86                           |
| XI.24847   | Transcribed locus                                                      | 77.2               | 36.7                | 1.85                           |
| XI.1040    | Frizzled 10A                                                           | 25.0               | 8.7                 | 1.82                           |
| XI.24545   | Chromogranin A                                                         | 25.9               | 9.6                 | 1.78                           |
| XI.11884   | Cytoplasmic FMR1 interacting protein 2                                 | 18.5               | 5.4                 | 1.77                           |
| XI.14572   | Transcribed locus                                                      | 11.0               | 1.8                 | 1.61                           |

\*Fold enrichment is adjusted to correct for unrealistically high ratios when denominator approaches zero. The ratio used to determine fold difference was VPB/(DPB+5).
